# Supplementary material for: Global Population Structure and Evolution of Bordetella pertussis and Their Relationship with Vaccination
Source: PubMed Central journal article supplement (PMC3994516; doi:10.1128/mbio.01074-14), 2014-04-22

A

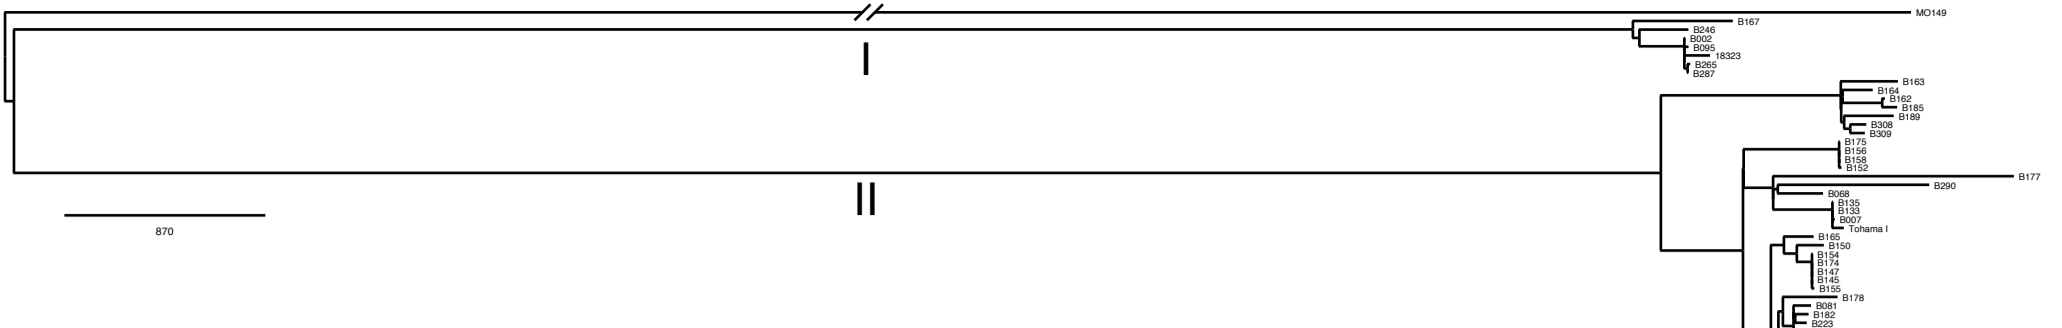

B

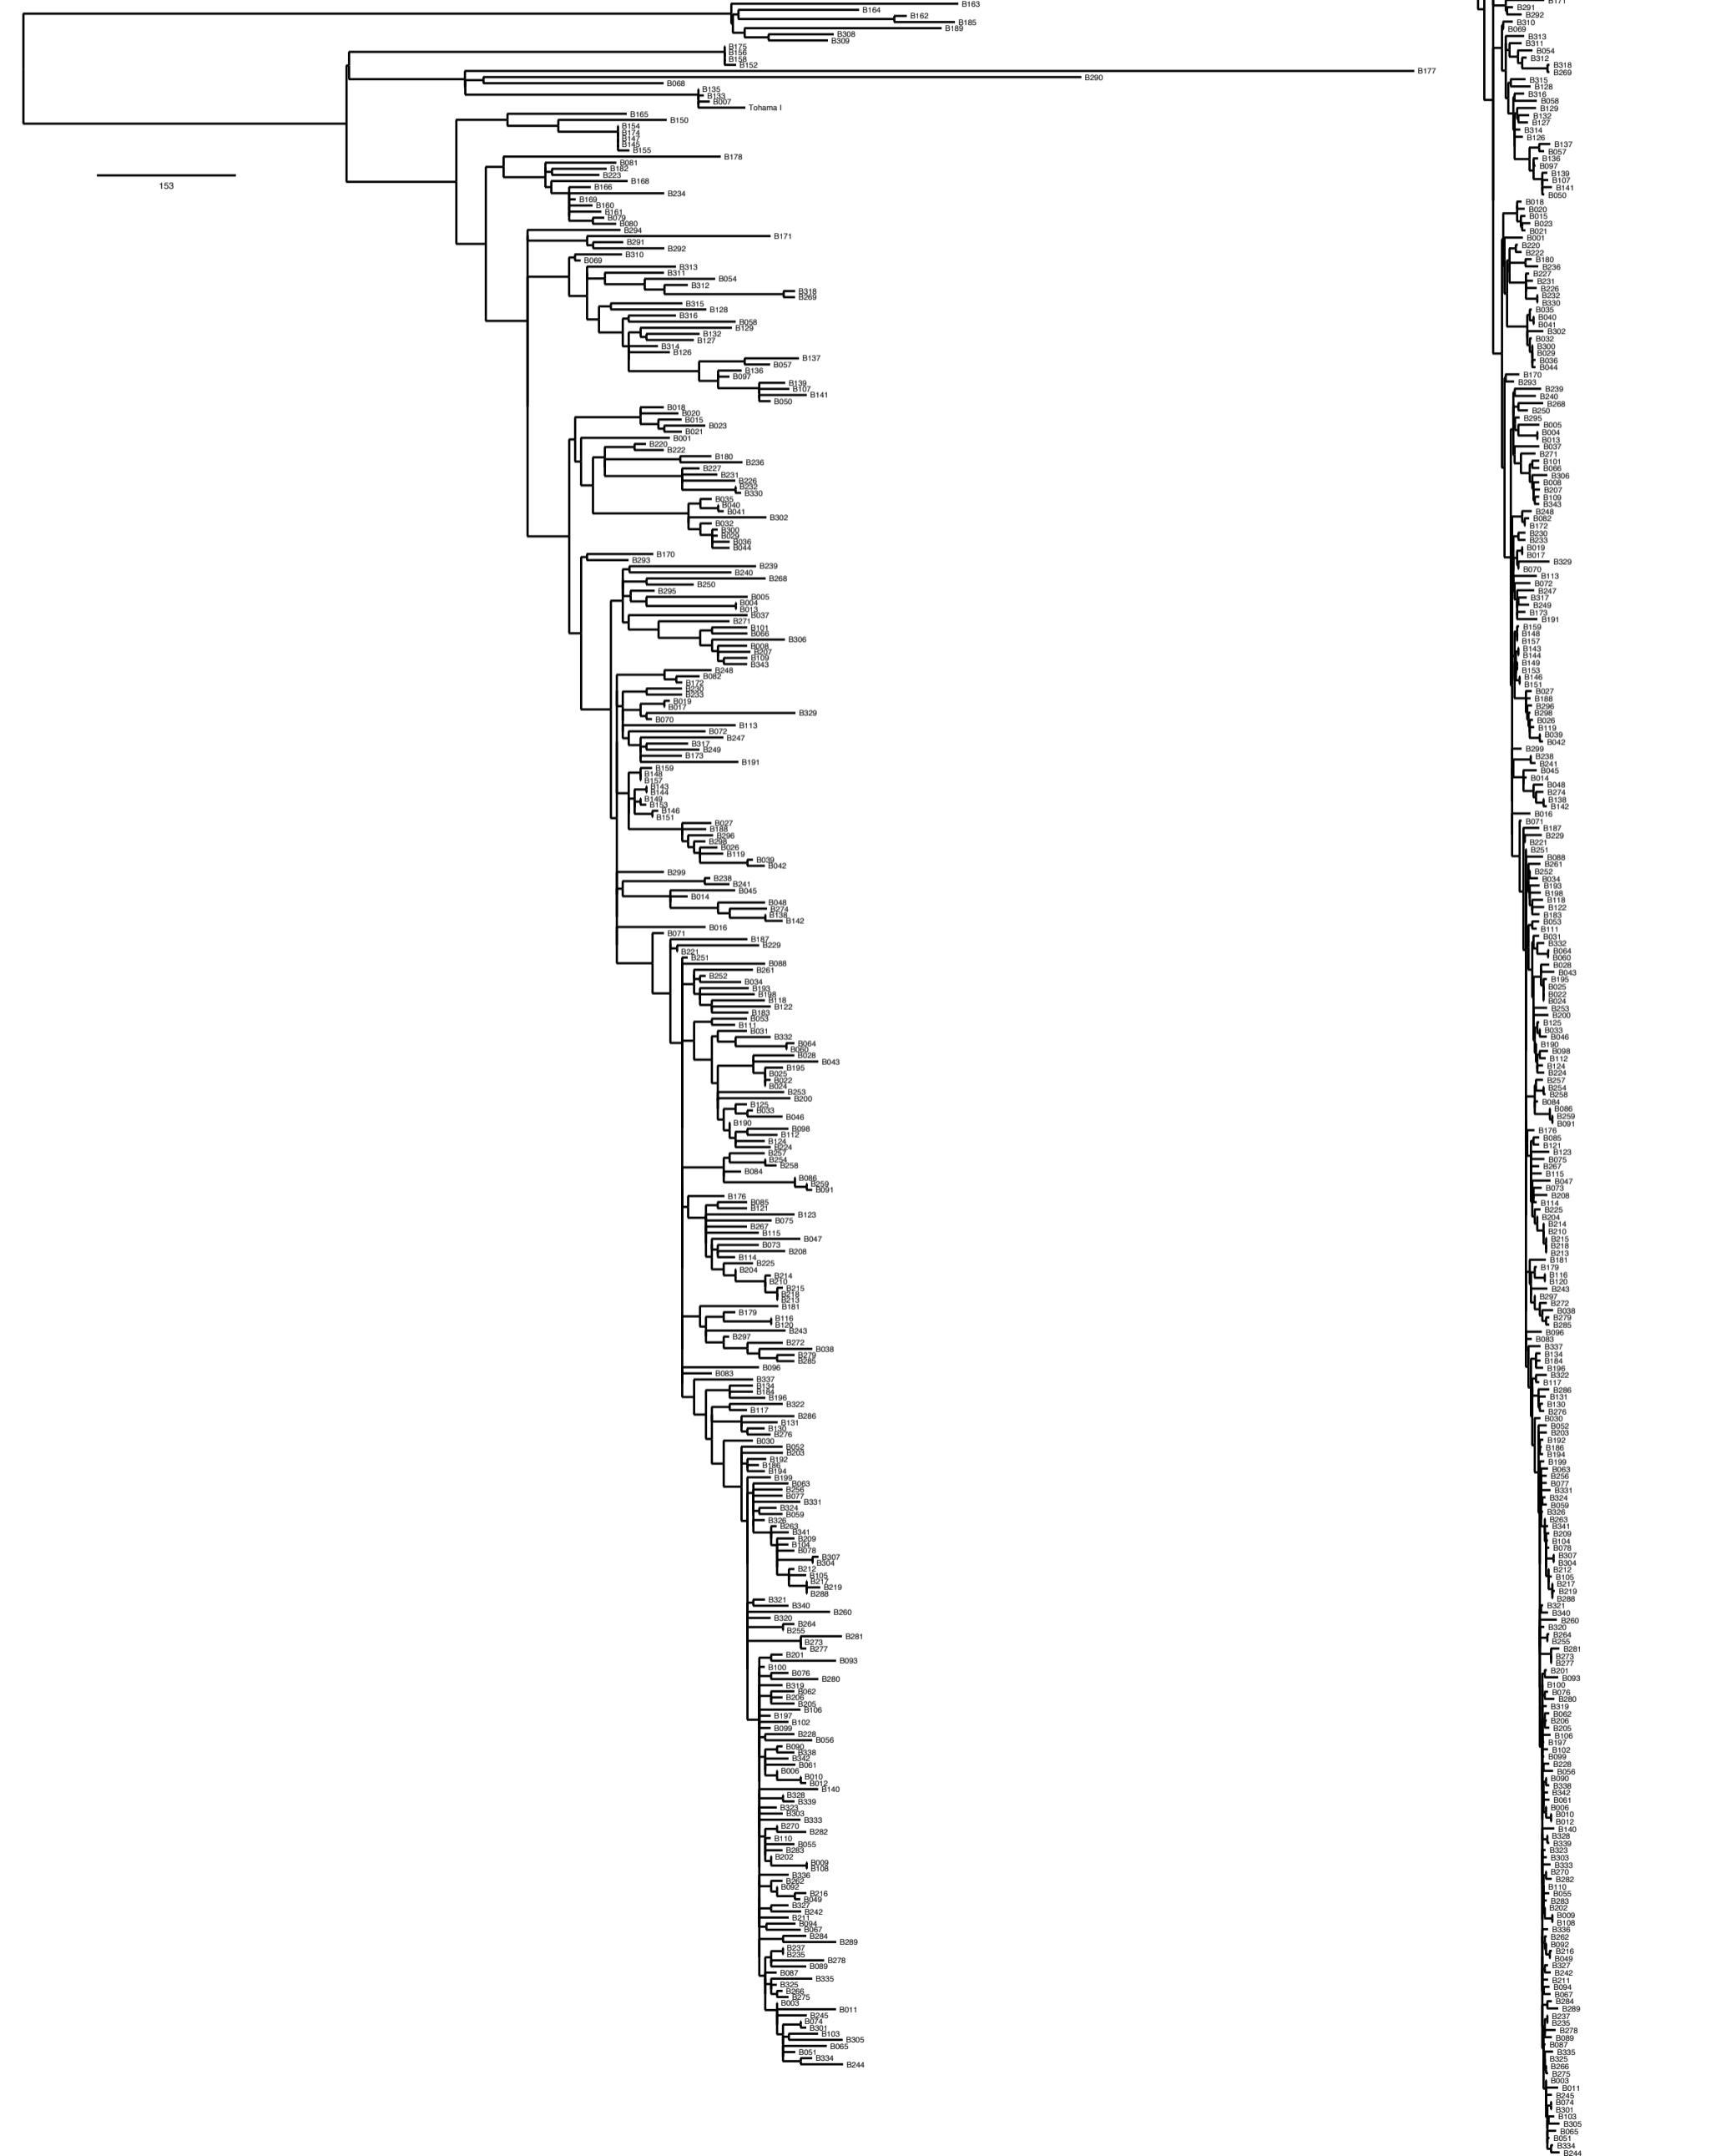

Supplement: mbo002141804sd3.pdf [file mbo002141804sd3.pdf]
