# Supplementary material for: Global Population Structure and Evolution of Bordetella pertussis and Their Relationship with Vaccination
Source: PubMed Central journal article supplement (PMC3994516; doi:10.1128/mbio.01074-14), 2014-04-22

**Supplemental File S5. Bayesian skyline plot of *B. pertussis* illustrating variation in effective population size of the major clade in lineage II over time.** Above the plot is the associated Bayesian phylogeny from Figure 1. The column of coloured bars alongside the tree indicates content of origin of the sample, as in Figure 1.

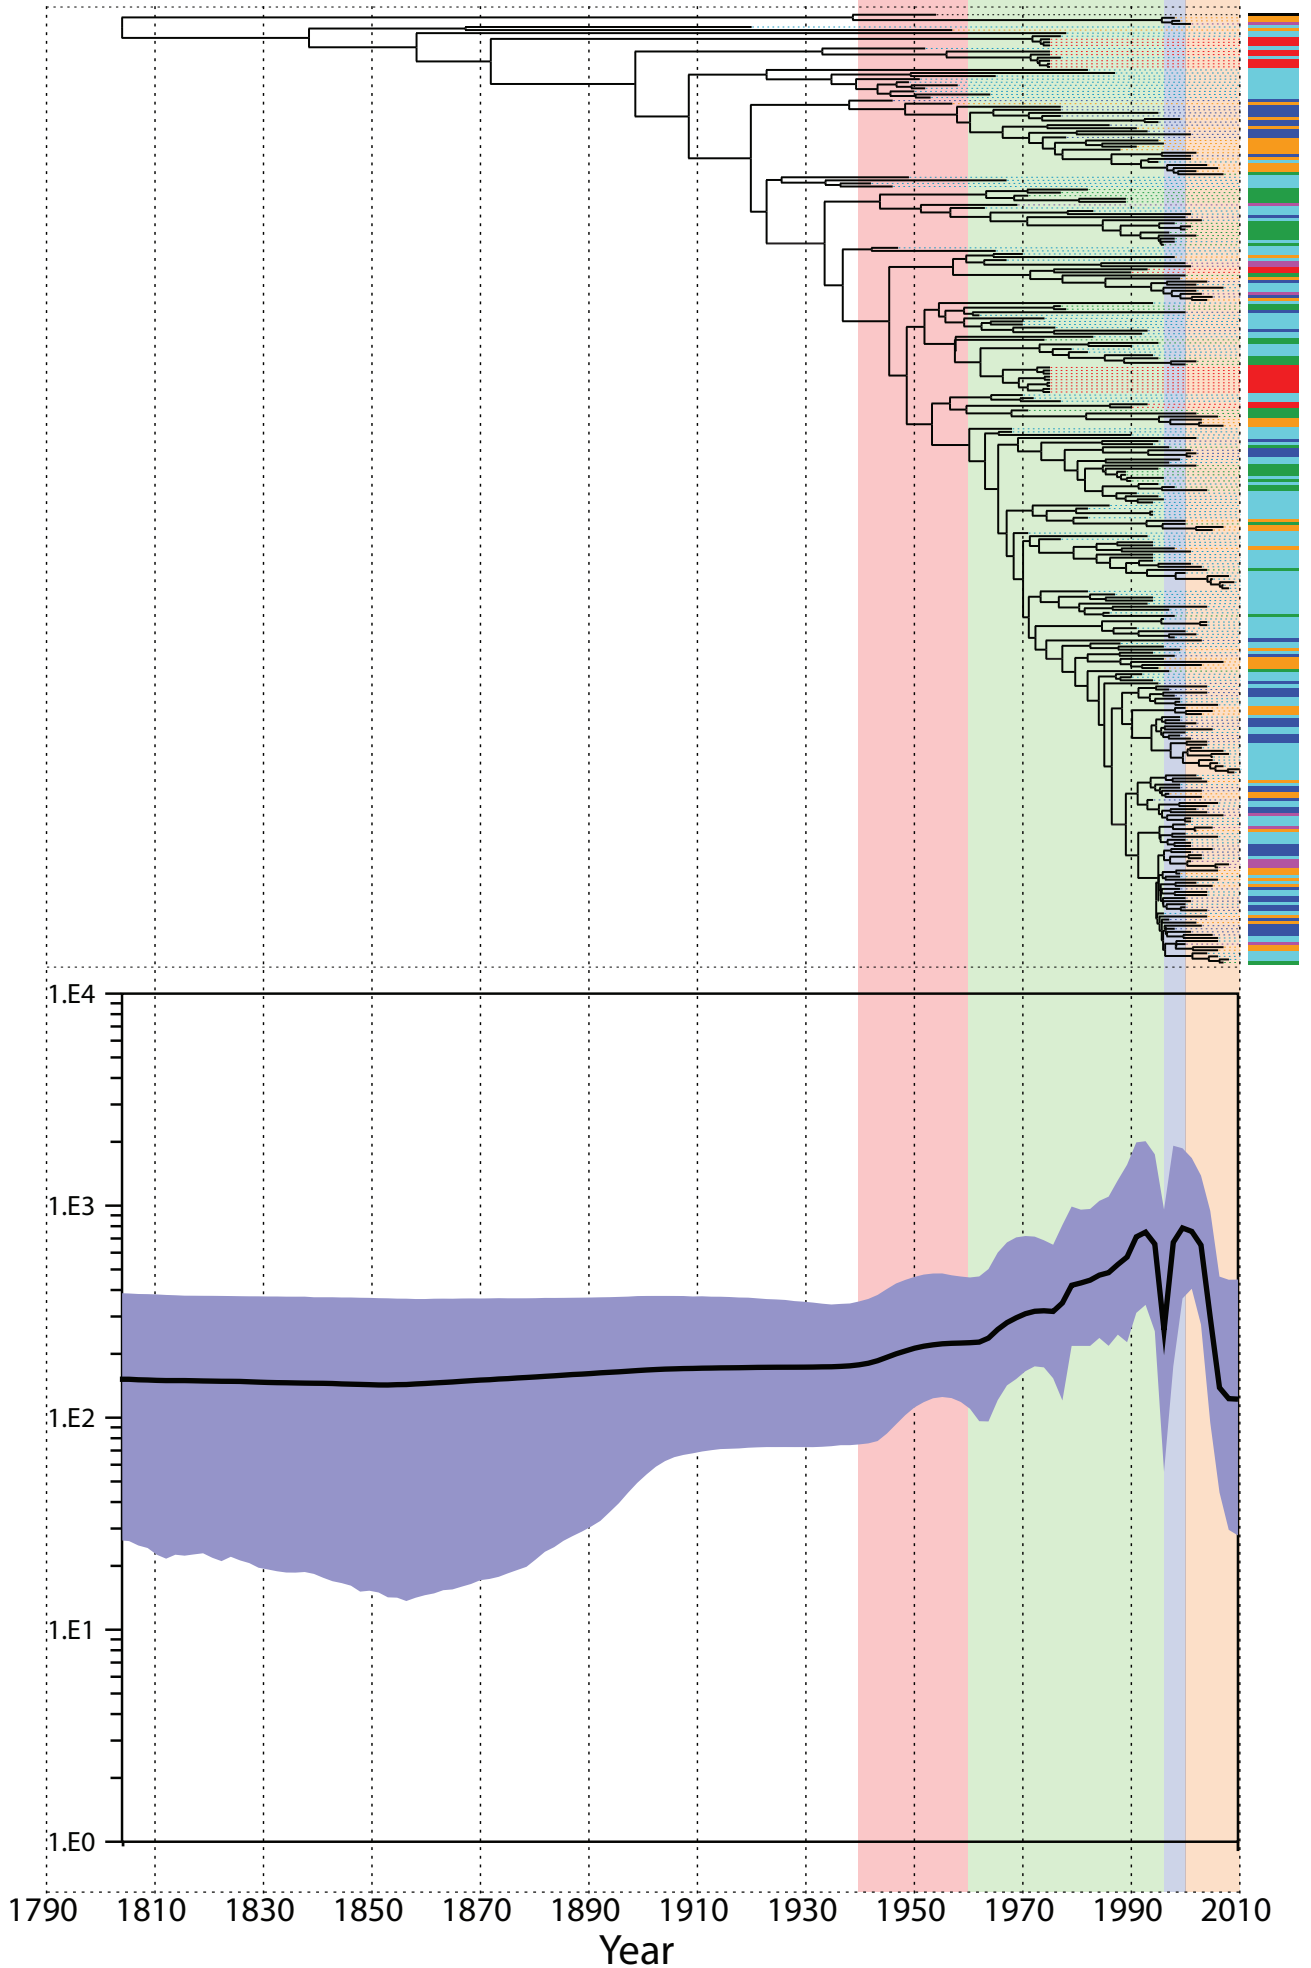

Supplement: mbo002141804sd5.pdf [file mbo002141804sd5.pdf]
